# Supplementary material for: The Balance Evaluation Systems Test (BESTest) to Differentiate Balance Deficits
Source: Oxford University Press journal article supplement (doi:10.2522/ptj.20080071), 2009-03-30
Supplement: ptj_89_5_484_eappendix.docx [file ptj_89_5_484_eappendix.docx]

## eAppendix

**Files in this Data Supplement:**

- [eAppendix (PDF) (76 KB)](file:///Y:\Content_Analysis\Physical%20Therapy\Supplements\ptjournal.view\89\5\484\dc1\89.5.484.DC1\zad70509000001.pdf) - Balance Evaluation Systems Test (BESTest)
